# Supplementary material for: A method for predicting basins in the global optimization of nanoclusters with applications to AlxCuy alloys
Source: Royal Society of Chemistry journal article supplement (doi:10.1039/d0cp01327g), 2020-01-01
Supplement: d0cp01327g1.pdf [file d0cp01327g1.pdf]

# A Method for Predicting Basins in the Global Optimization of Nanoclusters With Applications to $\text{Al}_x\text{Cu}_y$ nanoclusters

F. T. Silva, M. Yoshinaga and B. R. L. Galvão

Supporting Information

## Part I

Dissimilarity between the structure of the global minima of for several  $\text{Al}_x\text{Mg}_y$  clusters with the nine lowest energy isomers using the Gupta potential.

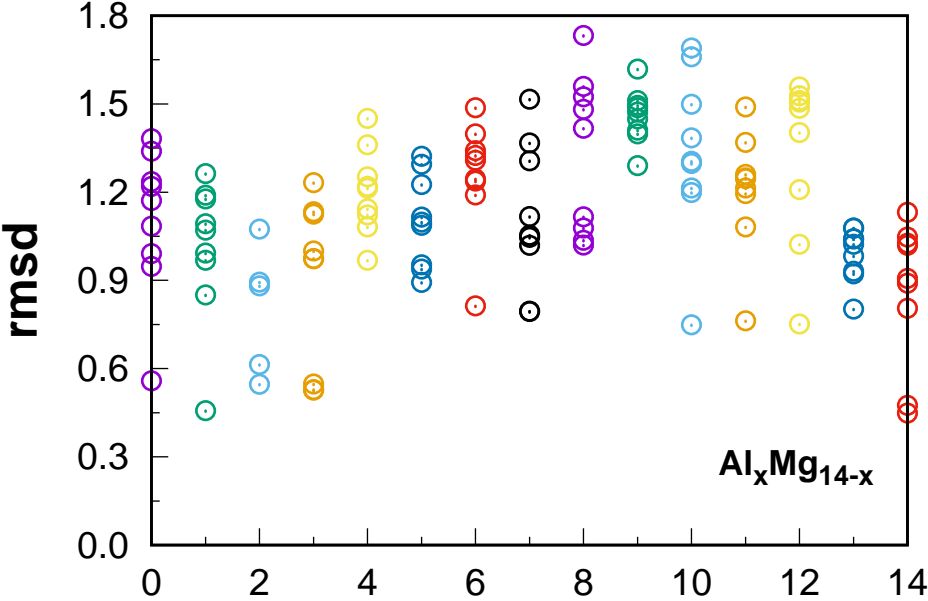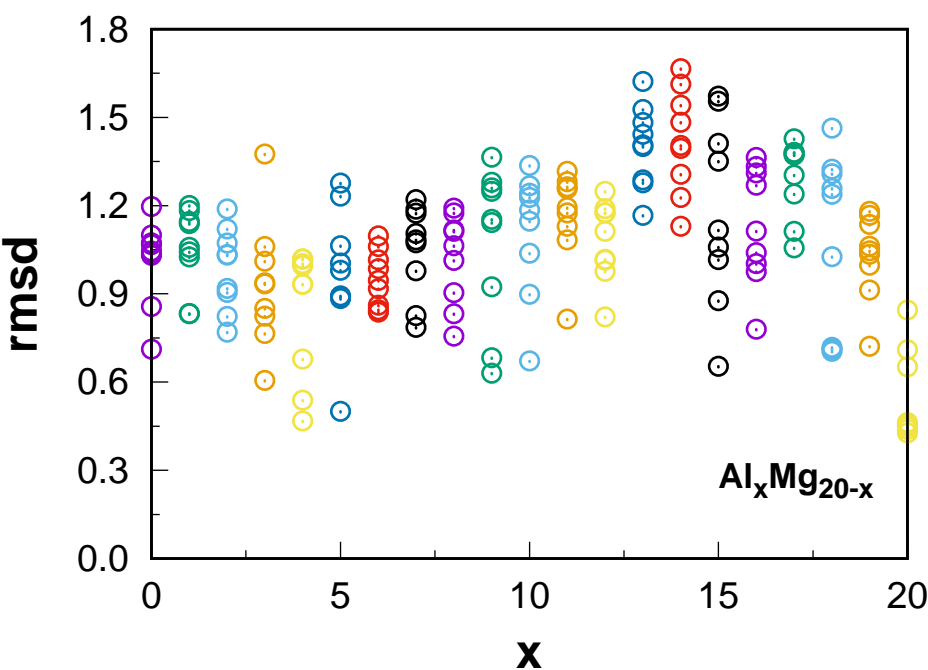

## **Part II**

Comparisons between cc-pVDZ and LANL2DZ/ECP results

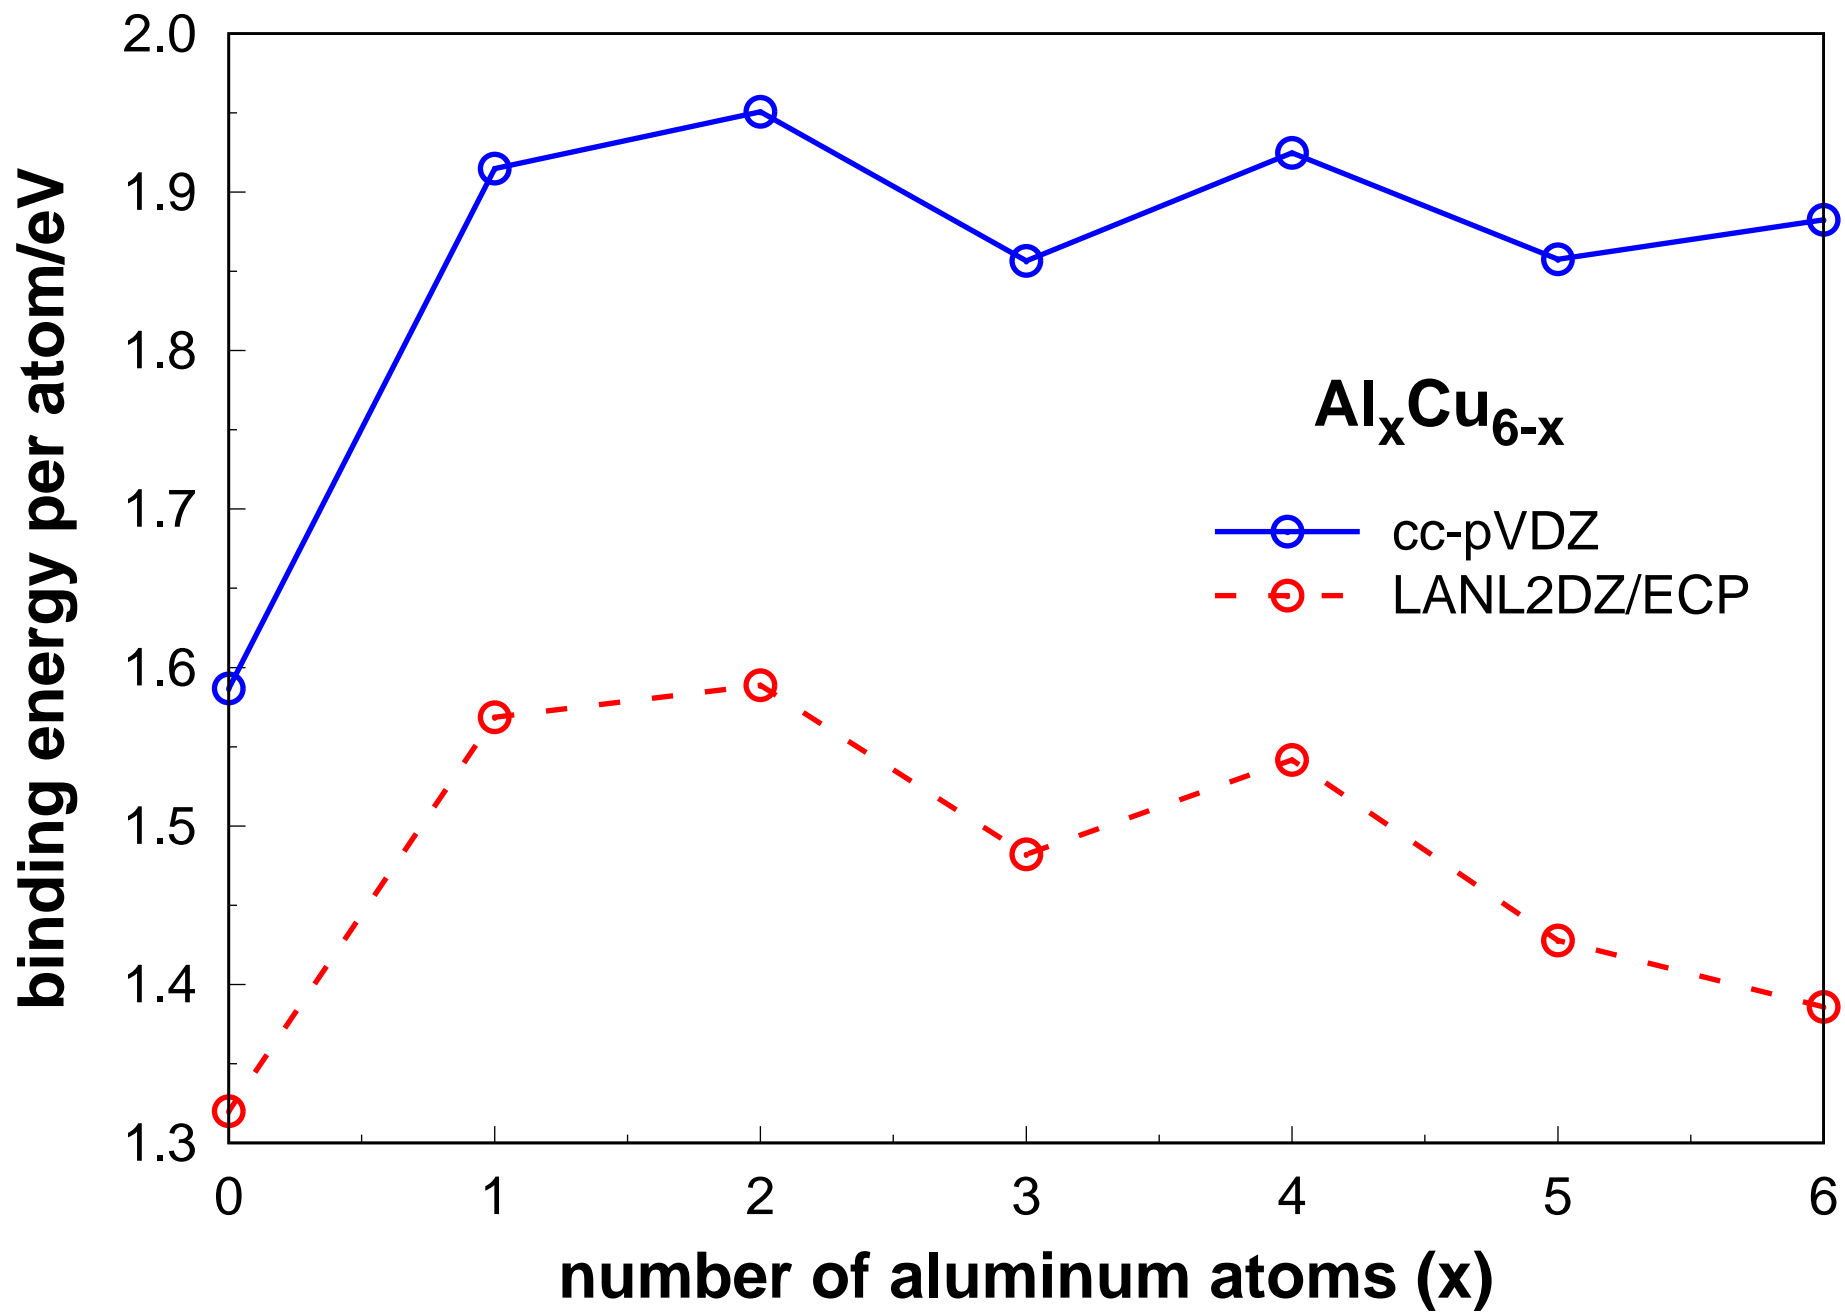

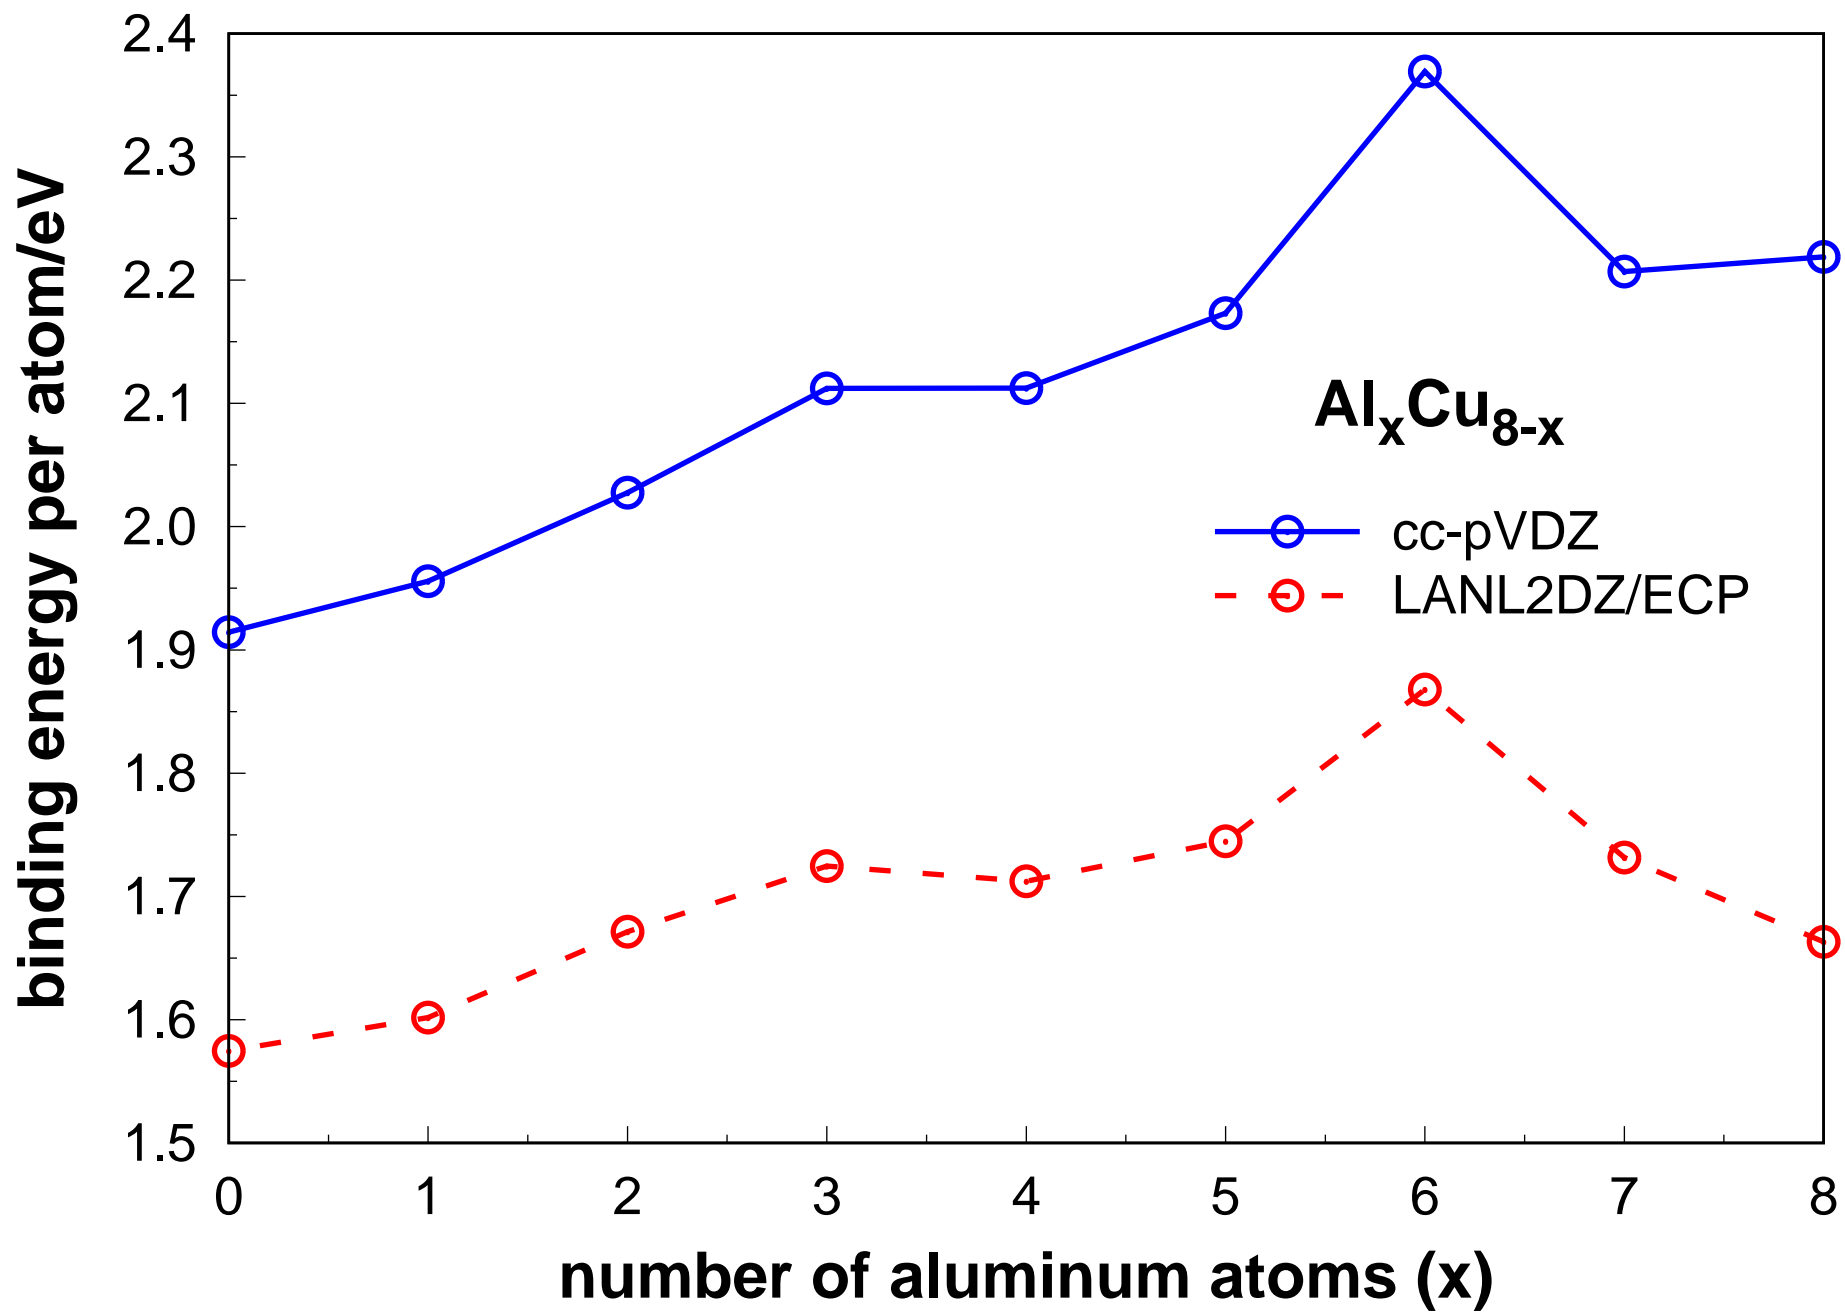

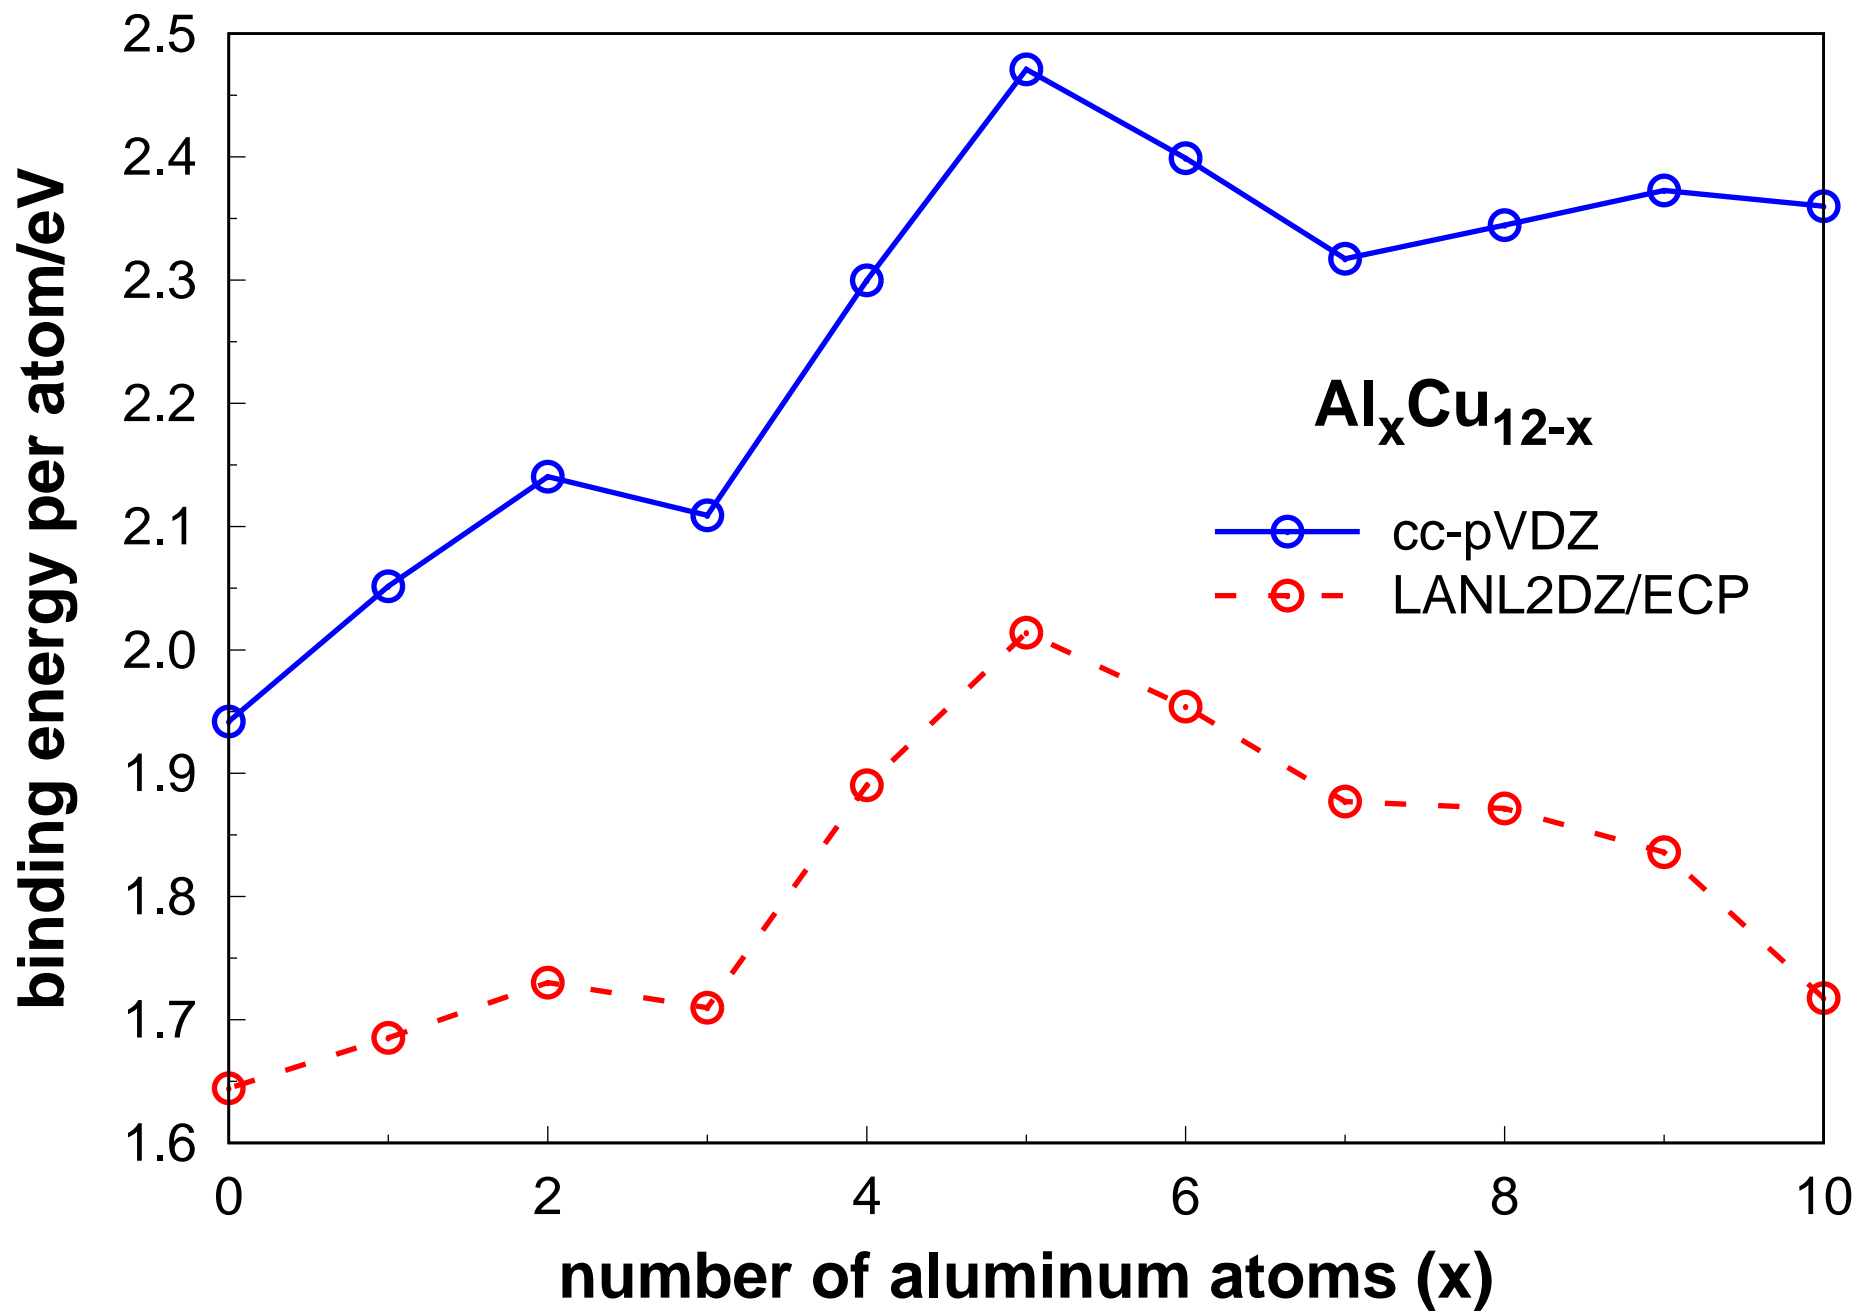

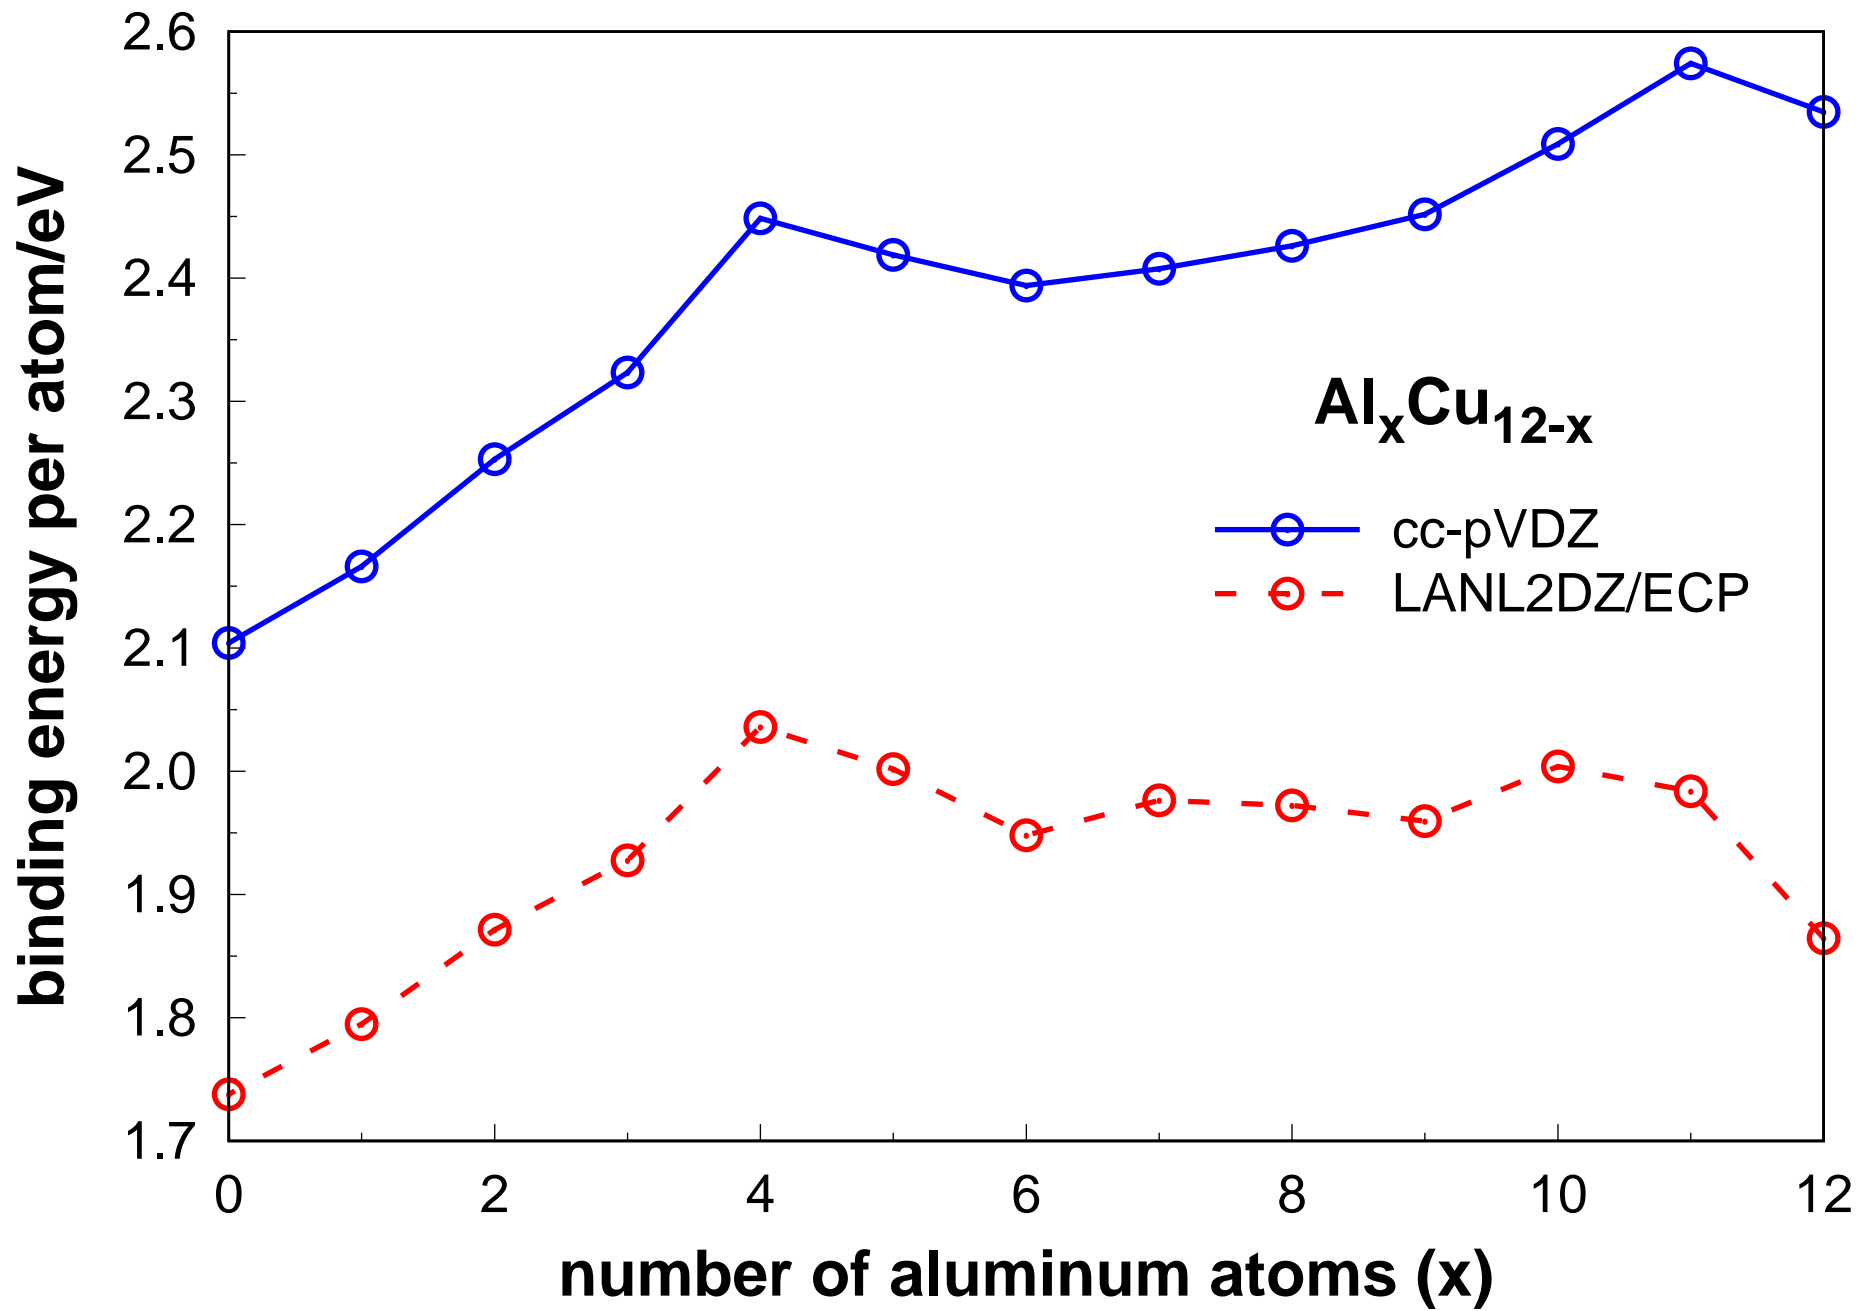



## **Part III**

Cartesian coordinates for the putative global minimum  
for each composition at the MP2/cc-pVDZ level

6

|    |             |             |             |
|----|-------------|-------------|-------------|
| Cu | 0.26608086  | 2.30009151  | 1.48789632  |
| Cu | 0.75391382  | 1.07416248  | -0.49732512 |
| Cu | -1.47927356 | -2.10622978 | 0.97495830  |
| Cu | 1.21188128  | -0.19325106 | -2.46353674 |
| Cu | -0.62377721 | 0.10121373  | 1.25306940  |
| Cu | -0.12882532 | -1.17598689 | -0.75506216 |

6

|    |             |             |             |
|----|-------------|-------------|-------------|
| Al | -0.92638677 | -1.15556276 | -0.52872384 |
| Cu | 0.92931980  | 1.15922177  | 0.53040832  |
| Cu | -0.65469038 | -0.23898987 | 1.66568542  |
| Cu | -1.30504131 | 1.20042777  | -0.34070742 |
| Cu | 0.65321314  | 0.23714833  | -1.66651833 |
| Cu | 1.30358553  | -1.20224535 | 0.33985576  |

6

|    |             |             |             |
|----|-------------|-------------|-------------|
| Al | -1.17059100 | -1.39822185 | -0.65315461 |
| Al | 1.17054987  | 1.39813590  | 0.65301806  |
| Cu | -0.60396910 | -0.22101256 | 1.55564988  |
| Cu | -1.19717407 | 1.14352131  | -0.30231619 |
| Cu | 0.60394228  | 0.22101052  | -1.55558121 |
| Cu | 1.19724202  | -1.14343333 | 0.30238414  |

6

|    |             |             |             |
|----|-------------|-------------|-------------|
| Al | -1.20528626 | -1.72209847 | 0.11609134  |
| Al | 1.20116186  | 1.60852623  | 0.63951606  |
| Al | 0.01417178  | 0.36284417  | -2.40393233 |
| Cu | -0.98936152 | 0.72263551  | -0.04401124 |
| Cu | 0.99215722  | -0.67767614 | -0.24367431 |
| Cu | -0.01284293 | -0.29423138 | 1.93601048  |

6

|    |             |             |             |
|----|-------------|-------------|-------------|
| Al | -1.08678794 | -1.34830952 | -0.36861148 |
| Al | 0.77966577  | 2.05712485  | -0.75445426 |
| Al | 0.14880264  | -0.06962460 | -2.31988740 |
| Al | -0.37987086 | 1.03483200  | 1.38555408  |
| Cu | 1.12817371  | -0.39326575 | 0.07965862  |
| Cu | -0.58998322 | -1.28075695 | 1.97774053  |

6

|    |             |             |             |
|----|-------------|-------------|-------------|
| Al | -0.55830479 | -1.93511868 | 0.80409855  |
| Al | 0.76067066  | 1.46685123  | -0.22486196 |
| Al | 1.02976549  | -0.07045092 | 1.90722299  |

|    |             |             |             |
|----|-------------|-------------|-------------|
| Al | -1.78103030 | 1.98804116  | -0.79645747 |
| Al | -0.86578637 | -0.44287574 | -1.35464227 |
| Cu | 1.41468525  | -1.00644708 | -0.33535981 |

6

|    |             |             |             |
|----|-------------|-------------|-------------|
| Al | -0.17298934 | -1.52394736 | -1.56574869 |
| Al | -1.05833459 | 1.01654136  | -1.46588767 |
| Al | 1.32516527  | 0.63106656  | -0.64857018 |
| Al | 1.09225941  | -1.70185506 | 0.84535927  |
| Al | 0.65892559  | 0.77491367  | 1.80765355  |
| Al | -1.84502637 | 0.80328077  | 1.02719378  |

8

|    |             |             |             |
|----|-------------|-------------|-------------|
| Cu | -0.01948599 | -1.34093034 | -1.82295299 |
| Cu | 0.23887071  | -1.52130282 | 0.55526662  |
| Cu | -0.14206044 | 1.56229639  | 0.46771640  |
| Cu | -1.08516681 | -0.07772847 | 1.98428261  |
| Cu | 1.43706369  | 0.22673857  | 1.73338962  |
| Cu | -1.58344471 | -0.20580836 | -0.35871598 |
| Cu | -0.33240321 | 1.19192672  | -1.89486134 |
| Cu | 1.48662686  | 0.16480826  | -0.66412497 |

8

|    |             |             |             |
|----|-------------|-------------|-------------|
| Al | 0.42755231  | 0.31573814  | 1.54249895  |
| Cu | 1.61455727  | 0.35833770  | -0.57820195 |
| Cu | -1.50710928 | 1.65164042  | 2.08441973  |
| Cu | -0.41968000 | -0.33359617 | -1.57849967 |
| Cu | -0.47388500 | 1.70613420  | -0.20586360 |
| Cu | -1.66731644 | -0.32496071 | 0.54067022  |
| Cu | 0.40830061  | -1.69458485 | 0.17639220  |
| Cu | 1.61758053  | -1.67870879 | -1.98141587 |

8

|    |             |             |             |
|----|-------------|-------------|-------------|
| Al | 0.52045238  | 0.62582356  | 1.76885343  |
| Al | -0.52044320 | -0.62575012 | -1.76889372 |
| Cu | -1.05898750 | 1.31670451  | -0.14708464 |
| Cu | 1.87403095  | -1.00506330 | -2.14272714 |
| Cu | -1.27588952 | -0.87849492 | 0.69337589  |
| Cu | -1.87402189 | 1.00499046  | 2.14276528  |
| Cu | 1.05905092  | -1.31665444 | 0.14722653  |
| Cu | 1.27580798  | 0.87844414  | -0.69351566 |

8

|    |             |             |             |
|----|-------------|-------------|-------------|
| Al | -1.39061511 | 0.14568684  | -1.96189606 |
| Al | -0.56399518 | -1.54022825 | 1.76459479  |

|    |             |             |             |
|----|-------------|-------------|-------------|
| Al | 1.95461142  | 1.39447689  | 0.19729219  |
| Cu | -0.64467949 | 0.83005100  | 0.51842731  |
| Cu | 0.64469421  | -0.82996595 | -0.51839304 |
| Cu | 0.54178840  | 1.47952127  | -1.69510484 |
| Cu | 1.33581185  | -0.13995296 | 1.88461959  |
| Cu | -1.87761617 | -1.33958876 | -0.18954006 |

8

|    |             |             |             |
|----|-------------|-------------|-------------|
| Al | -1.36244869 | 0.18581317  | -1.19237518 |
| Al | 1.49775290  | 1.16422260  | 1.60715818  |
| Al | 0.98118740  | -1.41876602 | 0.58055907  |
| Al | -0.38013247 | 2.44999671  | 0.18642920  |
| Cu | 0.29828674  | -1.50821590 | -1.75927174 |
| Cu | -1.35324192 | -1.90334368 | 0.06626628  |
| Cu | -0.82390845 | 0.27979085  | 1.34225905  |
| Cu | 1.14250457  | 0.75050241  | -0.83102494 |

8

|    |             |             |             |
|----|-------------|-------------|-------------|
| Al | -1.46914160 | -0.63508999 | -1.12778509 |
| Al | 2.05751181  | -0.66977203 | 0.76157522  |
| Al | 0.83281916  | 1.65726078  | 1.10182631  |
| Al | -0.58627439 | 1.98000681  | -1.20679224 |
| Al | -0.66035444 | -1.26950216 | 1.43200278  |
| Cu | 0.95580834  | 0.17451216  | -1.23682380 |
| Cu | -1.56761885 | 0.93987954  | 0.79455179  |
| Cu | 0.43724987  | -2.17729521 | -0.51855499 |

8

|    |             |             |             |
|----|-------------|-------------|-------------|
| Al | -1.54993629 | -0.65375817 | -0.96593595 |
| Al | 2.04308057  | -0.52923107 | 0.55851877  |
| Al | 0.63802207  | 1.53328001  | 1.41713560  |
| Al | -0.32428467 | 1.89684582  | -1.03102851 |
| Al | -0.56237930 | -1.02695596 | 1.54656446  |
| Al | 1.08076262  | -0.16566017 | -1.88963187 |
| Cu | -1.70953190 | 1.00947332  | 0.82193261  |
| Cu | 0.38426694  | -2.06399369 | -0.45755500 |

8

|    |             |             |             |
|----|-------------|-------------|-------------|
| Al | 1.01655746  | 0.23709741  | 1.72683692  |
| Al | -0.20303346 | 2.00351167  | 0.14635752  |
| Al | -0.88925701 | -0.21002720 | -1.79950130 |
| Al | 1.33400917  | 1.22889948  | -1.86782062 |
| Al | 2.53359699  | -0.51030374 | -0.31216621 |
| Al | 0.33016258  | -1.97750962 | -0.21986325 |
| Al | -3.05998707 | -0.57529718 | 1.72731304  |

Cu -1.06204867 -0.19637081 0.59884393  
8

Al -1.16380835 -1.38004684 -2.02961588  
Al 1.87084901 -0.03983984 -0.20877476  
Al 1.16412699 1.37975538 2.02964854  
Al -0.07369684 1.84388351 -0.37396467  
Al -0.62691981 -0.41751444 2.61028218  
Al 0.62658787 0.41785905 -2.61031079  
Al -1.87087846 0.03974741 0.20847578  
Al 0.07373958 -1.84384429 0.37425971

10

Cu 0.5843291862 -3.0066086526 -0.3591883539  
Cu -1.0197060520 -0.1526192492 1.8765705011  
Cu 0.3603985295 1.1923789007 -1.5688363055  
Cu -0.5093097916 -0.8340443713 -0.3991215616  
Cu -0.0238029393 3.2265224578 -0.0785957629  
Cu -2.7760411735 -0.6685817419 0.1261628287  
Cu 1.0342244744 -1.3811315258 1.3631242639  
Cu 1.7166611319 -0.7856652524 -0.9256788609  
Cu -1.4718525112 1.3699882819 -0.0097119659  
Cu 0.8278701456 0.9923483629 0.7517823970

10

Al -2.09473538 0.39971626 -0.97495836  
Cu -1.41736984 0.53449738 1.37180805  
Cu 0.34134200 1.01429868 -0.18418658  
Cu 0.53718865 1.92977726 2.06015754  
Cu 2.58451557 0.92315394 0.97039998  
Cu 0.00719866 -0.32417354 -2.17738724  
Cu 0.78396553 -0.45653853 1.68315220  
Cu -0.60076940 -1.40821505 -0.11765883  
Cu -1.95406044 -1.74926400 -2.14157033  
Cu 1.81272471 -0.86325246 -0.48975646

10

Al 1.55353856 0.57427377 1.17113698  
Al -1.55286312 -0.57598269 -1.16976833  
Cu 0.23839350 -1.52936709 0.90187138  
Cu -0.24077478 1.52880371 -0.90414524  
Cu 0.40372458 2.65323091 1.10739315  
Cu -2.13338470 -1.81127954 0.77590162  
Cu 2.13044405 1.81339788 -0.77320451  
Cu 1.05889106 -0.51341259 -1.14987731

|    |             |             |             |
|----|-------------|-------------|-------------|
| Cu | -1.05672288 | 0.51448107  | 1.15076864  |
| Cu | -0.40124607 | -2.65414548 | -1.11007619 |

|    |             |             |             |
|----|-------------|-------------|-------------|
| Al | 1.32010090  | 1.94978023  | 0.52286470  |
| Al | 0.50261283  | -0.28524470 | -1.00262713 |
| Al | -1.23979974 | 1.92682230  | -0.75391692 |
| Cu | -0.58748436 | 0.07010382  | 1.17671120  |
| Cu | 1.67470503  | 0.10598356  | 2.11316800  |
| Cu | -2.69666767 | 0.06666246  | -0.06708702 |
| Cu | -1.54605234 | -0.07193798 | -2.21129227 |
| Cu | -1.19063115 | -1.87438262 | -0.40419886 |
| Cu | 2.69725561  | -0.03376692 | -0.09494465 |
| Cu | 1.06596088  | -1.85402000 | 0.72132319  |

|    |             |             |             |
|----|-------------|-------------|-------------|
| Al | 1.85022664  | 0.74620253  | -0.91184449 |
| Al | -1.60225201 | 1.17961264  | 0.92360693  |
| Al | 1.12454414  | 0.82485211  | 1.92052162  |
| Al | -0.50609761 | -1.82235181 | -0.52170891 |
| Cu | -0.66365266 | -0.90700638 | 1.74939871  |
| Cu | -2.54830384 | -0.64754182 | -0.23203312 |
| Cu | 1.06185400  | -1.10074854 | -2.15127969 |
| Cu | -0.68146718 | 0.57611787  | -1.41782677 |
| Cu | 0.34932062  | 2.34400463  | 0.10361192  |
| Cu | 1.61582792  | -1.19314122 | 0.53755391  |

|    |             |             |             |
|----|-------------|-------------|-------------|
| Al | 2.04637170  | -0.75428504 | -0.55378109 |
| Al | -0.17942883 | 1.17980850  | 2.23270178  |
| Al | -1.90675259 | -0.16373211 | -1.18353021 |
| Al | -0.33736023 | -2.22447705 | 0.03159187  |
| Al | 0.47696894  | 1.30647802  | -1.76885581 |
| Cu | 1.44103491  | 1.37228024  | 0.46613586  |
| Cu | 0.92582250  | -0.86187148 | 1.60530865  |
| Cu | -1.06024361 | 1.74591827  | 0.06767239  |
| Cu | 0.16909310  | -1.11191082 | -2.10411811 |
| Cu | -1.57550609 | -0.48820883 | 1.20687473  |

|    |             |             |             |
|----|-------------|-------------|-------------|
| Al | 1.35178065  | -1.39413095 | -1.46010280 |
| Al | -1.24807537 | -0.22290690 | -1.58993518 |
| Al | -0.05117832 | -0.26727343 | 2.05020618  |
| Al | 1.91881740  | 0.67861074  | 0.37049171  |
| Al | -0.61707747 | -2.33940935 | 0.21922195  |

|    |             |             |             |
|----|-------------|-------------|-------------|
| Al | -1.30737078 | 3.42112827  | 0.39785111  |
| Cu | -2.09838486 | -0.42200527 | 0.69604945  |
| Cu | -0.44712132 | 1.24725914  | 0.17726319  |
| Cu | 1.63905311  | -1.69900537 | 0.96495277  |
| Cu | 0.85955703  | 0.99773324  | -1.82599843 |
| 10 |             |             |             |

|    |             |             |             |
|----|-------------|-------------|-------------|
| Al | -2.10819912 | -1.55826735 | 0.78562593  |
| Al | 0.62384278  | -1.65696228 | 0.97041893  |
| Al | 2.39325094  | 1.71474862  | -1.32783592 |
| Al | -1.78697240 | 1.37124622  | 0.93742830  |
| Al | 1.27341425  | -2.23201394 | -2.09630942 |
| Al | -1.32615101 | -0.20386021 | -1.38081884 |
| Al | 0.90520096  | 1.06891549  | 1.33156526  |
| Cu | 0.97916973  | -0.15681922 | -0.85407627 |
| Cu | -0.74048036 | -0.28046095 | 2.47079396  |
| Cu | -0.21307592 | 1.93347359  | -0.83679181 |
| 10 |             |             |             |

|    |             |             |             |
|----|-------------|-------------|-------------|
| Al | -1.18802464 | -1.14823246 | 0.10120154  |
| Al | 1.34040475  | 1.10417712  | 1.65763879  |
| Al | -0.05261181 | 2.41267896  | -0.20009081 |
| Al | -2.33188272 | 1.33194005  | 0.49568018  |
| Al | 1.54917610  | -2.28570580 | -0.56704432 |
| Al | -0.95684236 | 0.61292517  | -2.23007846 |
| Al | -1.02115893 | 0.21562909  | 2.51955175  |
| Al | 1.09328604  | -1.03907621 | -2.85987592 |
| Cu | 0.76136696  | -1.28126061 | 1.59765434  |
| Cu | 0.80628657  | 0.07692467  | -0.51463711 |
| 10 |             |             |             |

|    |             |             |             |
|----|-------------|-------------|-------------|
| Al | 1.06548798  | 0.02454537  | -2.73237062 |
| Al | 2.37379813  | -1.01354945 | -0.62659454 |
| Al | -2.07216239 | -0.47560957 | 0.35260269  |
| Al | -1.91087174 | 2.06846619  | 0.49921396  |
| Al | 0.23400435  | -1.74285960 | 1.24130893  |
| Al | -1.33706546 | 1.02159452  | -2.05382538 |
| Al | -0.57682168 | 0.66951114  | 2.45867896  |
| Al | 0.50653470  | 0.88787335  | -0.04724691 |
| Al | 2.02980089  | -0.09808662 | 2.01461005  |
| Cu | -0.31270453 | -1.34188545 | -1.10637736 |
| 10 |             |             |             |

|    |             |             |             |
|----|-------------|-------------|-------------|
| Al | 2.50787807  | -0.71856976 | -1.26997077 |
| Al | -2.50734019 | 0.71771777  | 1.27144051  |

|    |             |             |             |
|----|-------------|-------------|-------------|
| Al | 2.50828195  | 1.45319855  | 0.12428950  |
| Al | -0.00043772 | -1.11654210 | -0.71792471 |
| Al | -2.50870752 | -1.45220840 | -0.12571999 |
| Al | -0.71115303 | -1.38044858 | 2.14643717  |
| Al | -1.90347803 | 0.99783945  | -1.54907274 |
| Al | 1.90337455  | -0.99622691 | 1.55005431  |
| Al | 0.71107751  | 1.37924838  | -2.14709258 |
| Al | 0.00050433  | 1.11599159  | 0.71755922  |

12

|    |               |               |               |
|----|---------------|---------------|---------------|
| Cu | -1.1503812542 | 0.6661041703  | -0.6591392420 |
| Cu | 0.8185298224  | -0.4867369751 | 0.4768961917  |
| Cu | 2.4094264419  | -1.2829070220 | -1.0812467157 |
| Cu | -1.4474277927 | -1.4425102438 | 0.5134183234  |
| Cu | 1.6160682651  | 0.7322245852  | 2.3398493054  |
| Cu | -3.1469424551 | 0.2470119426  | 0.6504433144  |
| Cu | -2.6409279471 | -1.0362781205 | -1.5291641050 |
| Cu | 1.1366327140  | 0.7216319619  | -1.6015052357 |
| Cu | 2.8706664475  | 0.7659277121  | 0.2148917593  |
| Cu | 0.6594012690  | 1.9328589145  | 0.4552511416  |
| Cu | -0.1744091796 | -1.3933434965 | -1.5619949825 |
| Cu | -0.9506362910 | 0.5760163013  | 1.7823003950  |

12

|    |               |               |               |
|----|---------------|---------------|---------------|
| Al | 1.0546110422  | -1.8828805248 | -0.8917190086 |
| Cu | -0.5537705830 | 0.9961138415  | 1.7994487146  |
| Cu | 2.7656858857  | -1.3618869356 | 0.7859574336  |
| Cu | 2.8149102031  | -0.2719075032 | -1.4573026310 |
| Cu | -0.9734040667 | -0.3332929489 | -0.1833268322 |
| Cu | 0.3836890652  | -1.3634394534 | 1.4986821104  |
| Cu | 1.3965067130  | 0.5807503521  | 0.3128605230  |
| Cu | -0.5066814617 | 2.0394177768  | -0.3478322847 |
| Cu | 0.4601314700  | 0.3284237160  | -1.9830765133 |
| Cu | -2.1421776435 | -0.8825163325 | 1.7879864372  |
| Cu | -2.0619051838 | 0.8965628231  | -1.8734406535 |
| Cu | -2.6375953505 | 1.2546551188  | 0.5517628446  |

12

|    |             |             |             |
|----|-------------|-------------|-------------|
| Al | -0.93894398 | -0.05279230 | -2.09053516 |
| Al | 1.26508296  | 1.59206247  | 1.05809486  |
| Cu | 1.56355417  | -0.46810037 | 2.27471662  |
| Cu | -0.91228801 | 1.49056101  | -0.14007160 |
| Cu | 1.26923430  | -1.32079208 | -2.04667926 |
| Cu | 2.73694515  | -0.22534722 | 0.04999693  |
| Cu | -2.85294938 | 1.37054992  | 1.28101158  |



|    |             |             |             |
|----|-------------|-------------|-------------|
| Cu | -2.06739378 | -0.59472942 | 0.05042849  |
| Cu | -0.71139240 | 0.41705033  | 1.98739874  |
| Cu | 0.40575776  | -0.87555933 | 0.17341229  |
| Cu | -0.91794246 | -2.31983471 | -1.26993179 |
| Cu | 1.16033578  | 0.98693156  | -1.32784152 |

12

|    |               |               |               |
|----|---------------|---------------|---------------|
| AL | 0.4312429879  | 1.8267478784  | -1.5653408402 |
| AL | -2.1101176159 | -0.6972921063 | -0.1159101954 |
| AL | 1.6346923634  | 0.6940960214  | 0.7398552514  |
| CU | -1.7663724722 | 1.7146325214  | -0.4524255547 |
| CU | -1.1816004149 | 0.0278626132  | -2.2461365107 |
| CU | 0.2023358804  | 2.7105964367  | 0.6608882499  |
| CU | -0.7200439519 | 0.5973234972  | 1.5137780116  |
| CU | 1.0785677404  | -0.6586195070 | 2.6749954693  |
| CU | -0.0633118058 | -1.6396456414 | 0.8202769141  |
| CU | 2.2979759101  | -1.6527971717 | 0.5743771844  |
| CU | 0.9541137897  | -0.6167388627 | -1.2052519643 |
| CU | -0.7574824112 | -2.3061656792 | -1.3991060153 |

12

|    |             |             |             |
|----|-------------|-------------|-------------|
| Al | -0.93107051 | 0.10576822  | -2.26094460 |
| Al | -0.50430763 | -2.20577002 | 0.93290913  |
| Al | 2.73895407  | -0.23176104 | -0.53376293 |
| Al | -0.31907171 | 1.66728091  | 1.24928105  |
| Cu | 0.81705260  | 1.18081331  | -0.98679245 |
| Cu | -1.63131893 | -2.06738281 | -1.27830005 |
| Cu | 2.17096853  | 1.70333481  | 0.94269359  |
| Cu | -1.63172591 | -0.10212774 | 0.14419250  |
| Cu | 0.66670734  | -1.32293880 | -1.04652178 |
| Cu | -1.02065086 | -0.36527815 | 2.48032427  |
| Cu | -1.47284508 | 2.08362269  | -0.90344673 |
| Cu | 1.11730814  | -0.44556141 | 1.26036799  |

12

|    |             |             |             |
|----|-------------|-------------|-------------|
| Al | -1.92659342 | 1.77290475  | 0.37705854  |
| Al | -2.21427226 | -2.05678415 | -1.57525885 |
| Al | 0.03561469  | -1.68593359 | 1.57119405  |
| Al | 0.53430396  | -0.11216693 | -2.11647367 |
| Al | 2.19937325  | 1.69883776  | 1.15928900  |
| Cu | 2.52535653  | 1.18718171  | -1.30407548 |
| Cu | 0.30581552  | 1.78310061  | -0.54086071 |
| Cu | -1.11675763 | -0.33237213 | -0.39455312 |
| Cu | -0.03235823 | 0.80079091  | 1.70406902  |
| Cu | -2.14200234 | -0.35920253 | 1.75132084  |

|    |            |             |             |
|----|------------|-------------|-------------|
| Cu | 0.27820918 | -2.26270151 | -0.82796252 |
| Cu | 1.55331087 | -0.43365490 | 0.19625273  |

12

|    |             |             |             |
|----|-------------|-------------|-------------|
| Al | 2.88715410  | 0.24966444  | 1.82898903  |
| Al | -1.80333853 | 1.49062681  | 1.08265007  |
| Al | -0.94526625 | -1.01347089 | 1.33944249  |
| Al | 0.11939318  | 2.09595633  | -0.72899163 |
| Al | -1.27928221 | -0.09030364 | -2.27394986 |
| Al | 1.21142411  | -0.24945965 | -1.00796735 |
| Cu | 3.47356749  | -1.19399023 | -0.08656589 |
| Cu | -2.65167356 | -0.44745702 | -0.29078096 |
| Cu | -0.61418927 | -1.94601429 | -0.85698700 |
| Cu | -2.34304738 | 1.82207704  | -1.23349202 |
| Cu | 0.60514551  | 0.89833397  | 1.30819416  |
| Cu | 1.34011292  | -1.61596286 | 0.91945904  |

12

|    |             |             |             |
|----|-------------|-------------|-------------|
| Al | -1.63053024 | -0.94827944 | 1.89862835  |
| Al | -0.01446132 | 3.44555640  | -0.29067397 |
| Al | 2.49902415  | -0.90690744 | 0.55241132  |
| Al | -0.58748811 | 1.91909242  | 1.81875896  |
| Al | -0.85144877 | -1.28946590 | -2.18496132 |
| Al | 0.23204952  | -2.39505887 | 0.24448363  |
| Al | 0.17696458  | 1.58403945  | -2.18976188 |
| Cu | -2.07812476 | -2.07569051 | -0.22296779 |
| Cu | 1.29189610  | -0.55441546 | -1.51441753 |
| Cu | -0.89099115 | 0.21615385  | -0.18789099 |
| Cu | 0.63098937  | -0.26504388 | 1.94947171  |
| Cu | 1.22212064  | 1.27001941  | 0.12691955  |

12

|    |               |               |               |
|----|---------------|---------------|---------------|
| Al | -1.0929578870 | -0.3331804679 | 1.5012980868  |
| Al | 2.6291232426  | -1.5512271499 | -0.3495952177 |
| Al | -0.3978748304 | -2.5106980717 | -2.2556882405 |
| Al | 0.3830220824  | 1.7691382939  | 2.6098444531  |
| Al | 2.3475649446  | -0.0666498337 | 2.1375559920  |
| Al | -1.8864004460 | -0.5073701423 | -1.4888158814 |
| Al | -2.9903291477 | 1.1190869315  | 0.3186318563  |
| Al | -0.1213831380 | 1.7275884162  | -1.5345938660 |
| Cu | 0.9481799026  | -0.4438275261 | -1.9525663241 |
| Cu | 0.0940445953  | -1.7456934503 | -0.0112229039 |
| Cu | -0.8531233978 | 2.1059333147  | 0.6907277229  |
| Cu | 0.9401339095  | 0.4368997358  | 0.3344243225  |

12

|    |             |             |             |
|----|-------------|-------------|-------------|
| Al | 0.13036361  | -2.64910293 | 0.55582952  |
| Al | -1.37859535 | 1.25795734  | 1.27342272  |
| Al | 0.75509238  | 0.74881369  | 2.96093273  |
| Al | -0.49884087 | 2.72439456  | -1.07868826 |
| Al | 2.12185836  | -1.25884640 | 1.62726605  |
| Al | 1.28785706  | 1.11061978  | 0.21469857  |
| Al | 0.76922232  | 0.93064684  | -2.65306020 |
| Al | -0.89774621 | -1.13256836 | -2.46631384 |
| Al | -2.34120703 | 0.85023743  | -1.44848919 |
| Cu | -0.65820122 | -1.03983414 | 2.21648526  |
| Cu | 1.44546688  | -1.00753212 | -1.02829421 |
| Cu | -0.73526990 | -0.53478563 | -0.17378893 |
| 12 |             |             |             |

|    |             |             |             |
|----|-------------|-------------|-------------|
| Al | 2.20932198  | -1.82121277 | -0.87652600 |
| Al | 0.34425956  | -1.85269260 | 1.26309776  |
| Al | -2.38246846 | -1.74941254 | 0.48051241  |
| Al | -2.72576857 | 0.46673596  | -0.90783447 |
| Al | 1.96557379  | 1.95245016  | -0.10872941 |
| Al | 2.66216564  | -0.19317047 | 1.17060113  |
| Al | -1.65129423 | 2.00931787  | 0.96109134  |
| Al | 1.80632961  | 0.39538094  | -2.24816751 |
| Al | -1.60256600 | -0.12669224 | 2.43111539  |
| Al | -0.43956321 | -1.04077542 | -1.43166769 |
| Cu | 0.19421153  | 0.43533039  | 0.63386440  |
| Cu | -0.38020152 | 1.52474082  | -1.36735725 |
| 12 |             |             |             |

|    |             |             |             |
|----|-------------|-------------|-------------|
| Al | 2.24537802  | -0.83073509 | -1.29069293 |
| Al | -2.29705596 | 0.83522904  | 1.42967415  |
| Al | 1.06104958  | 1.48952210  | -2.16254711 |
| Al | 2.19724512  | 1.56750405  | 0.33723441  |
| Al | 0.23470843  | 1.18532658  | 2.43686414  |
| Al | 0.31426117  | -2.69477820 | -0.19697559 |
| Al | -0.17086944 | -1.29676521 | -2.51150584 |
| Al | -2.24535060 | -1.70033288 | -0.29187492 |
| Al | -0.25375471 | 2.80740666  | 0.27423117  |
| Al | -0.94884604 | 0.51944005  | -0.79299903 |
| Al | -0.92921859 | -1.44856286 | 2.10648489  |
| Cu | 0.79245299  | -0.43325421 | 0.66210639  |
| 12 |             |             |             |

|    |             |             |             |
|----|-------------|-------------|-------------|
| Al | -2.47760868 | -0.54993868 | 0.56802613  |
| Al | 0.41023988  | 2.48721480  | -0.63934612 |

|    |             |             |             |
|----|-------------|-------------|-------------|
| AI | 1.99583852  | -1.34245622 | 1.39669490  |
| AI | -1.99583745 | 1.34245944  | -1.39669788 |
| AI | 2.47761035  | 0.54993612  | -0.56801927 |
| AI | -0.41023827 | -2.48721480 | 0.63934976  |
| AI | 0.41260475  | 0.54534894  | -2.50916338 |
| AI | 1.37615466  | -1.81044030 | -1.26260304 |
| AI | 1.37236643  | 1.33184671  | 1.76307285  |
| AI | -1.37615585 | 1.81044161  | 1.26259983  |
| AI | -0.41260877 | -0.54534954 | 2.50916100  |
| AI | -1.37236547 | -1.33184814 | -1.76307464 |
